# Supplementary material for: The Complete Genome Sequence of Bacillus toyonensis Cbmb3 with Polyvinyl Chloride-Degrading Properties
Source: MDPI journal article supplement (doi:10.3390/jox14010018), 2024-02-26
Supplement: s1 [file s1]

# Supplementary Materials: The Complete Genome Sequence of *Bacillus toyonensis* Cbmb3 with Polyvinyl Chloride-Degrading Properties

Dandan Wang, Hong Yu, Xinbei Liu, Li Sun, Xijian Liu, Ruilong Hu, Chao Wang, Yuping Zhuge and Zhihong Xie

Table S1. The features of prophages in the Cbmb3 genome.

| Phage | Sequence   | Phage Start | Phage End | attL Star | attL End | attR Start | attR End |
|-------|------------|-------------|-----------|-----------|----------|------------|----------|
| pp1   | Chromosome | 50173       | 63344     | 51058     | 51071    | 62210      | 62223    |
| pp2   | Chromosome | 94067       | 149447    | 96527     | 96540    | 148622     | 148635   |
| pp3   | Chromosome | 922511      | 933435    | 925776    | 925819   | 930325     | 930368   |
| pp4   | Chromosome | 1599210     | 1617030   | 1600191   | 1600204  | 1630124    | 1630137  |
| pp5   | Chromosome | 2061457     | 2097658   | 2061979   | 2061994  | 2094320    | 2094335  |
| pp6   | Chromosome | 2890585     | 2906656   | 2891107   | 2891122  | 2923448    | 2923463  |
| pp7   | Chromosome | 3520140     | 3551592   | 3520662   | 3520677  | 3553003    | 3553018  |
| pp8   | Chromosome | 3700378     | 3723515   | 3700900   | 3700915  | 3733241    | 3733256  |
| pp9   | Chromosome | 4038837     | 4070854   | 4038729   | 4038745  | 4068435    | 4068451  |
| pp10  | Chromosome | 4094198     | 4107464   | 4092358   | 4092448  | 4107762    | 4107852  |
| pp11  | Chromosome | 4168832     | 4190612   | 4168724   | 4168740  | 4198430    | 4198446  |
| pp12  | Chromosome | 4445220     | 4453837   | 4444340   | 4444487  | 4451052    | 4451199  |
| pp13  | Chromosome | 4808717     | 4824417   | 4806877   | 4806967  | 4822281    | 4822371  |
| pp14  | Chromosome | 5064541     | 5118750   | 5066218   | 5066232  | 5117666    | 5117680  |
| pp15  | Chromosome | 5286012     | 5295672   | 5285132   | 5285279  | 5291844    | 5291991  |
| pp16  | Plasmid1   | 86459       | 160039    | 84820     | 84834    | 159638     | 159652   |
| pp17  | Plasmid2   | 477         | 32466     | 973       | 994      | 35384      | 35407    |
| pp18  | Plasmid3   | 113         | 11616     | 1121      | 1268     | 7833       | 7980     |
| pp19  | Plasmid3   | 63806       | 70514     | 62926     | 63073    | 69638      | 69785    |

Table S2. The features of genomic islands in the Cbmb3 genome.

| Genomic island | Start     | End       | Region length (bp) |
|----------------|-----------|-----------|--------------------|
| GI-1           | 919,795   | 955,858   | 36,063             |
| GI-2           | 1,234,820 | 1,262,831 | 28,011             |
| GI-3           | 2,045,356 | 2,070,545 | 25,189             |
| GI-4           | 3,341,575 | 3,351,698 | 10,123             |
| GI-5           | 3,557,657 | 3,567,416 | 9,759              |
| GI-6           | 3,669,313 | 3,696,736 | 27,423             |
| GI-7           | 3,746,391 | 3,757,251 | 10,860             |
| GI-8           | 4,035,589 | 4,050,440 | 14,851             |
| GI-9           | 4,107,631 | 4,111,703 | 4,072              |
| GI-10          | 4,261,446 | 4,290,478 | 29,032             |

**Table S3.** The features of CRISPR in the Cbmb3 genome.

| CRISPR | Sequence   | CRISPR Start | CRISPR End | CRISPR Length (bp) |
|--------|------------|--------------|------------|--------------------|
| 1      | Chromosome | 1070099      | 1070185    | 86                 |
| 2      | Chromosome | 1070531      | 1070674    | 143                |
| 3      | Chromosome | 1070912      | 1071054    | 142                |
| 4      | Chromosome | 4821392      | 4821500    | 108                |
| 5      | Chromosome | 4874331      | 4874438    | 107                |
| 6      | Chromosome | 5080856      | 5080989    | 133                |
| 7      | Plasmid    | 164870       | 164947     | 77                 |
| 8      | Plasmid    | 72978        | 73401      | 423                |
| 9      | Plasmid    | 36826        | 37785      | 959                |
| 10     | Plasmid    | 37883        | 38113      | 230                |

**Table S4.** Closely related species of Cbmb3 based on EzBioCloud.

| Strains                                  | Accession    | Similarity  |
|------------------------------------------|--------------|-------------|
| <i>Bacillus toyonensis</i> BCT-7112      | CP006863     | 100         |
| <i>Bacillus mobilis</i> 0711P9-1         | MACF01000036 | 99.93215739 |
| <i>Bacillus pacificus</i> EB422          | KJ812450     | 99.93215739 |
| <i>Bacillus thuringiensis</i> ATCC 10792 | ACNF01000156 | 99.93215739 |
| <i>Bacillus wiedmannii</i> FSL W8-0169   | LOBC01000053 | 99.79647218 |
| <i>Bacillus proteolyticus</i> TD42       | MACH01000033 | 99.72862958 |
| <i>Bacillus albus</i> N35-10-2           | MAOE01000087 | 99.72862958 |
| <i>Bacillus luti</i> TD41                | MACI01000041 | 99.72862958 |
| <i>Bacillus fungorum</i> 17-SMS-01       | MG601116     | 99.72862958 |
| <i>Bacillus cereus</i> ATCC 14579        | AE016877     | 99.66078697 |
| <i>Bacillus paramycoides</i> NH24A2      | MAOI01000012 | 99.66078697 |
| <i>Bacillus tropicus</i> N24             | MACG01000025 | 99.66078697 |
| <i>Bacillus paranthracis</i> Mn5         | MACE01000012 | 99.59294437 |
| <i>Bacillus nitrati</i> reducens 4049    | KJ812430     | 99.59294437 |
| <i>Bacillus anthracis</i> Ames           | AE016879     | 99.52510176 |
| <i>Bacillus clarus</i> ATCC 21929        | MH918154     | 99.45725916 |
| <i>Bacillus mycoides</i> DSM 2048        | ACMU01000002 | 99.38941655 |
| <i>Bacillus thuringiensis</i> NCTC 6474  | UAPX01000031 | 99.37759336 |
| <i>Bacillus pseudomycoides</i> DSM 12442 | ACMX01000133 | 99.25373134 |
| <i>Bacillus gaemokensis</i> KCTC 13318   | LTAQ01000012 | 98.9137814  |

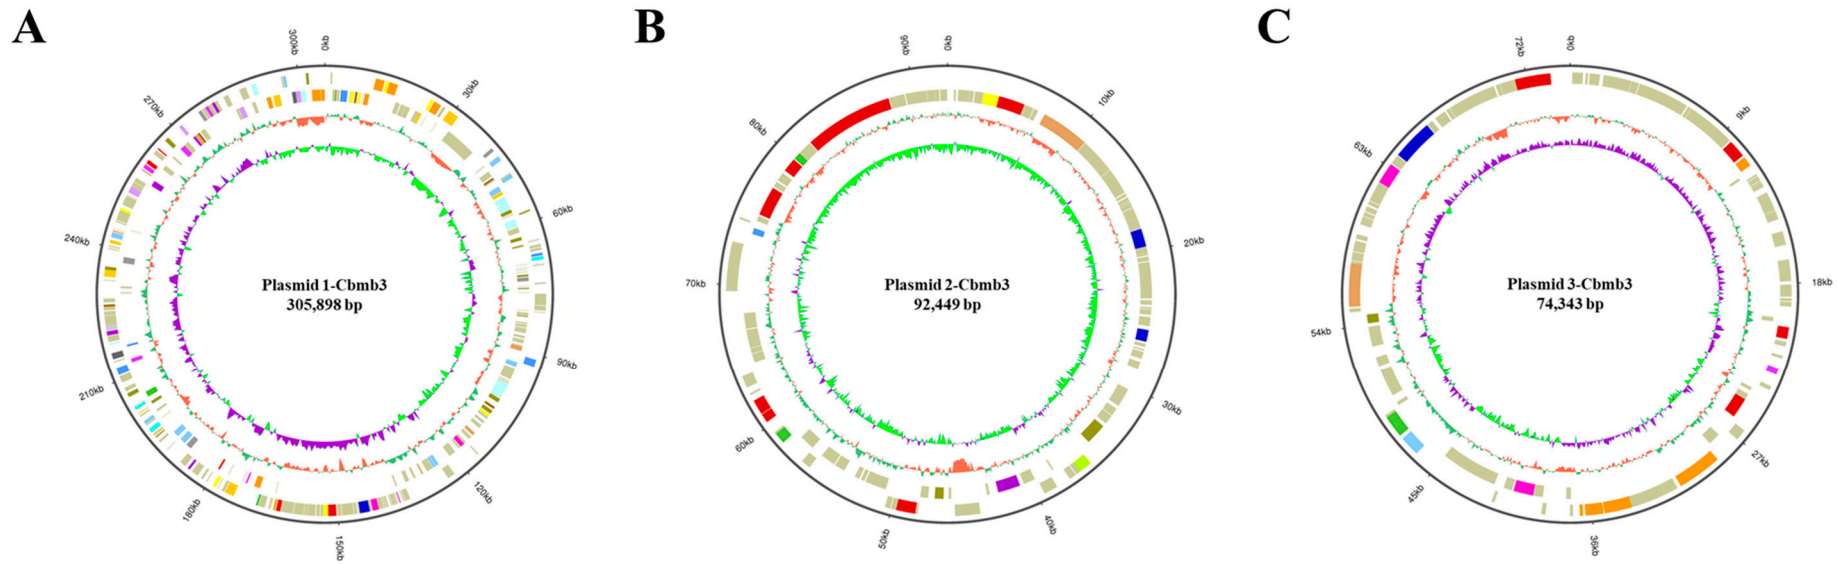

**Figure S1. Structure and functional analysis of the three plasmids of *Cbmb3*.** Rings represent the following features labeled from outside to inside: ring 1, genome size; ring 2, forward strand gene; ring 3, reverse strand gene; ring 4, GC content; ring 5, GC-skew, green and purple correspond to above- and below-average GC skew, respectively.
